# Supplementary material for: How Meaningful Are Minor Details in the Generation of Nanomodified Electrochemical Enzyme Biosensors? Exploring the Scenario with Sinusoidal Approaches
Source: MDPI journal article supplement (doi:10.3390/chemosensors10080316), 2022-08-07
Supplement: s1 [file s1]

# How Meaningful Are Minor Details in the Generation of Nanomodified Electrochemical Enzyme Biosensors? Exploring the Scenario with Sinusoidal Approaches

Md. Towhidur Rahman <sup>1</sup>, David López-Iglesias <sup>1</sup>, Alfonso Sierra-Padilla <sup>1</sup>, Juan José García-Guzmán <sup>2,\*</sup>, Laura M. Cubillana-Aguilera <sup>1,\*</sup>, Dolores Bellido-Milla <sup>1</sup> and José María Palacios-Santander <sup>1</sup>

<sup>1</sup> Department of Analytical Chemistry, Institute of Research on Electron Microscopy and Materials (IMEYMAT), Faculty of Sciences, Campus de Excelencia Internacional del Mar (CEIMAR), University of Cadiz, Campus Universitario de Puerto Real, S/N. 11510 Puerto Real, Cadiz, Spain

<sup>2</sup> Instituto de Investigación e Innovación Biomédica de Cadiz (INIBICA), Hospital Universitario 'Puerta del Mar', Universidad de Cadiz, 11009 Cadiz, Spain

\* Correspondence: [juan.garcia@inibica.es](mailto:juan.garcia@inibica.es) (J.J.G.-G.); [laura.cubillana@uca.es](mailto:laura.cubillana@uca.es) (L.M.C.-A.); Tel: +34-956-016357 (J.J.G.-G. & L.M.C.-A.)

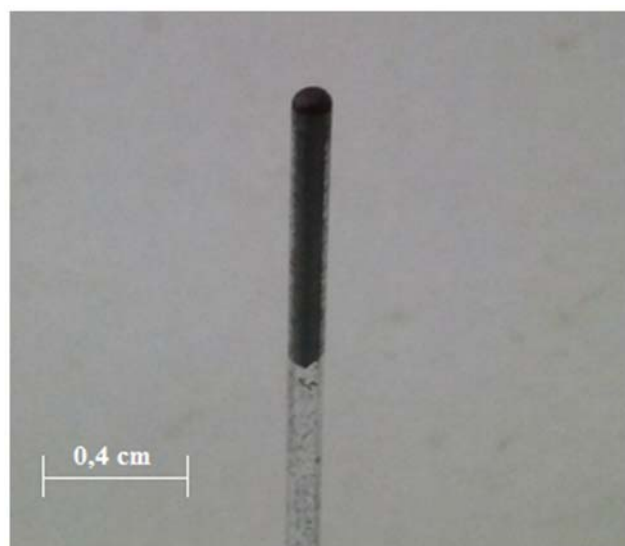

**Figure S1.** Picture of a tyrosinase and gold nanoparticles-modified SNGC electrode by using drop-casting method.

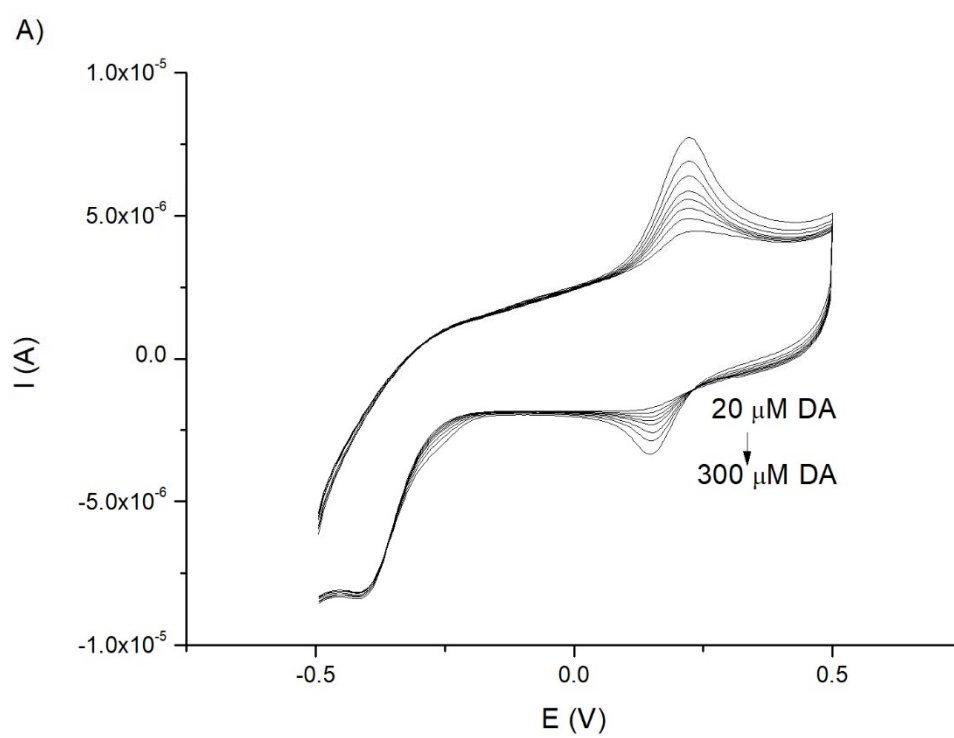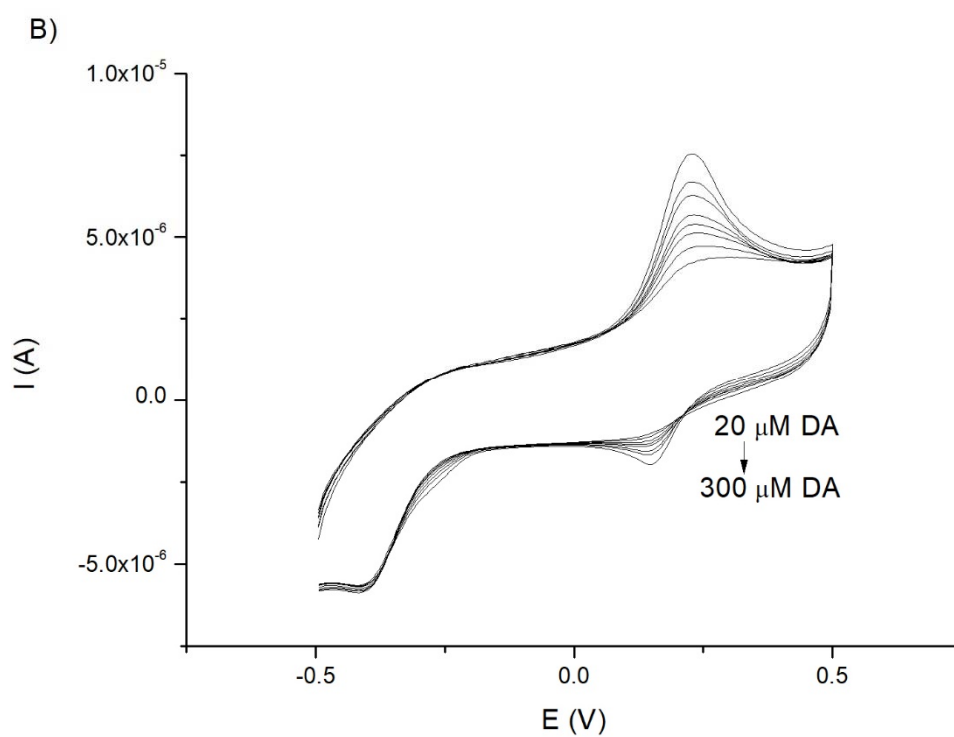

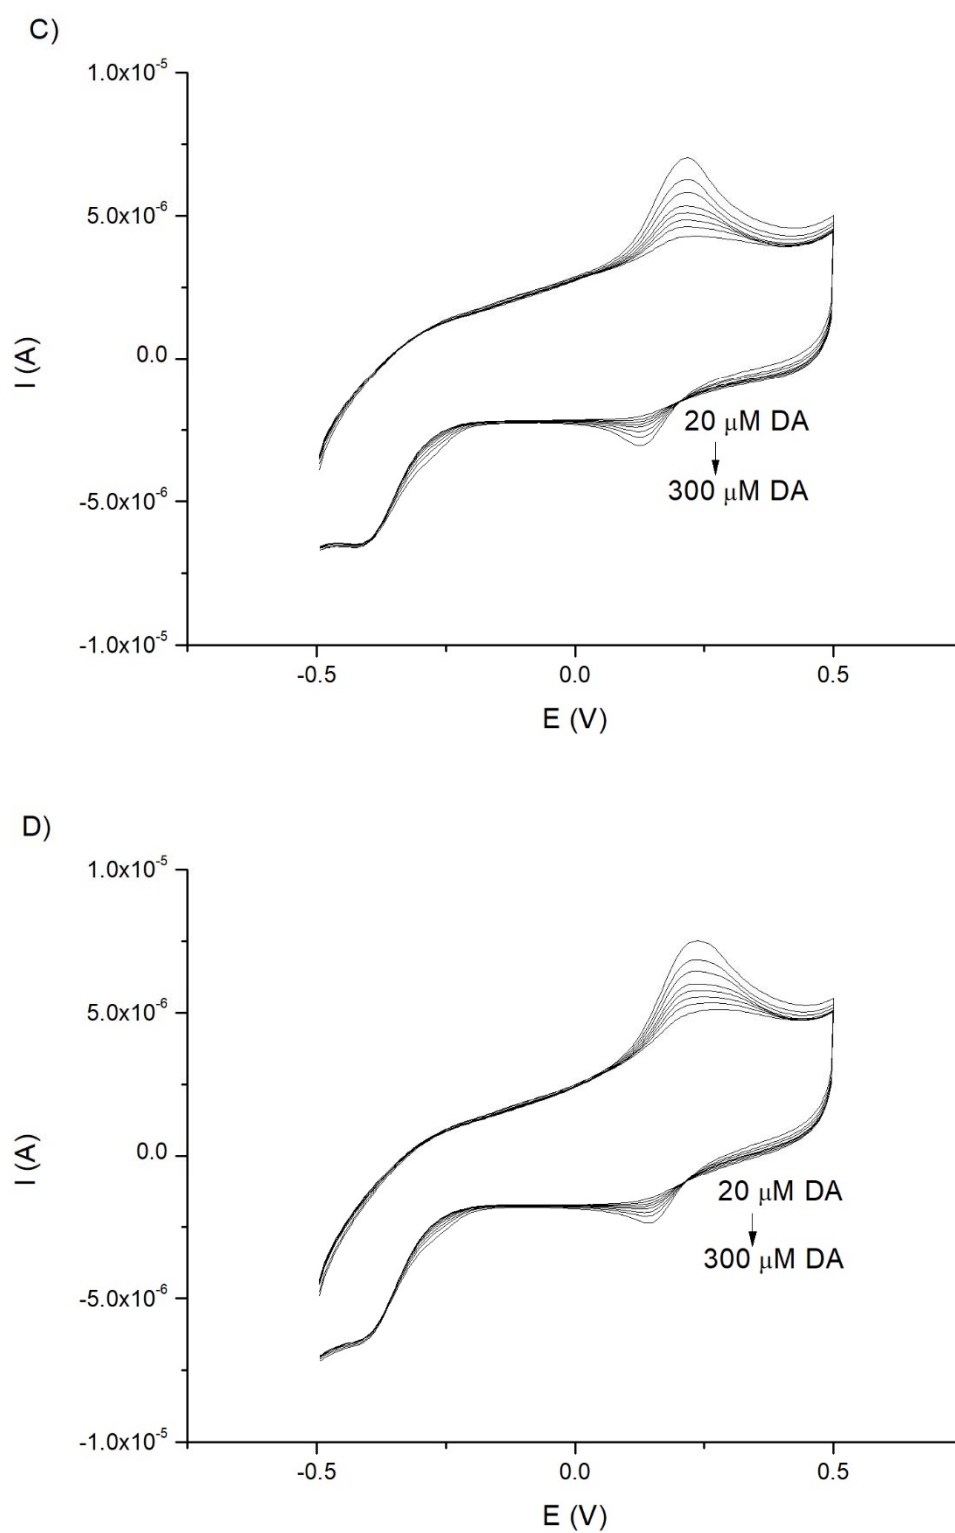

**Figure S2.** Cyclic voltammograms for the determination of dopamine in presence of different concentrations of AA, using a SNGC/PEDOT+Tyr-SC biosensor: (A) 500  $\mu\text{M}$  and (B) 1000  $\mu\text{M}$ , and a SNGC/PEDOT+Tyr-SC/AuNPs (drop) biosensor: (C) 500  $\mu\text{M}$  and (D) 1000  $\mu\text{M}$ .

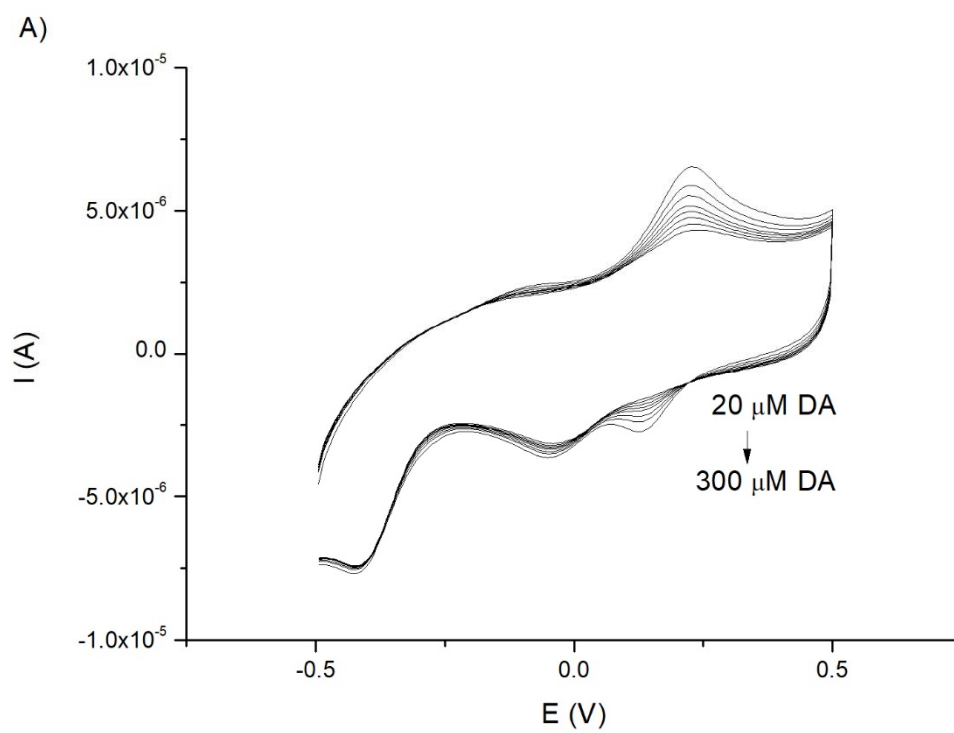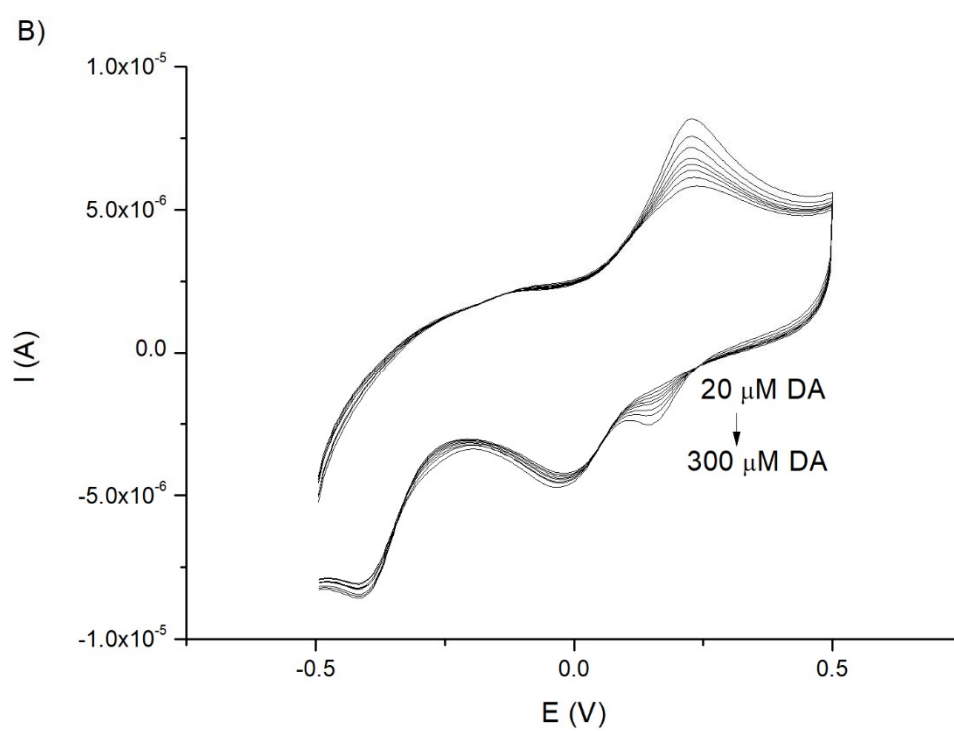

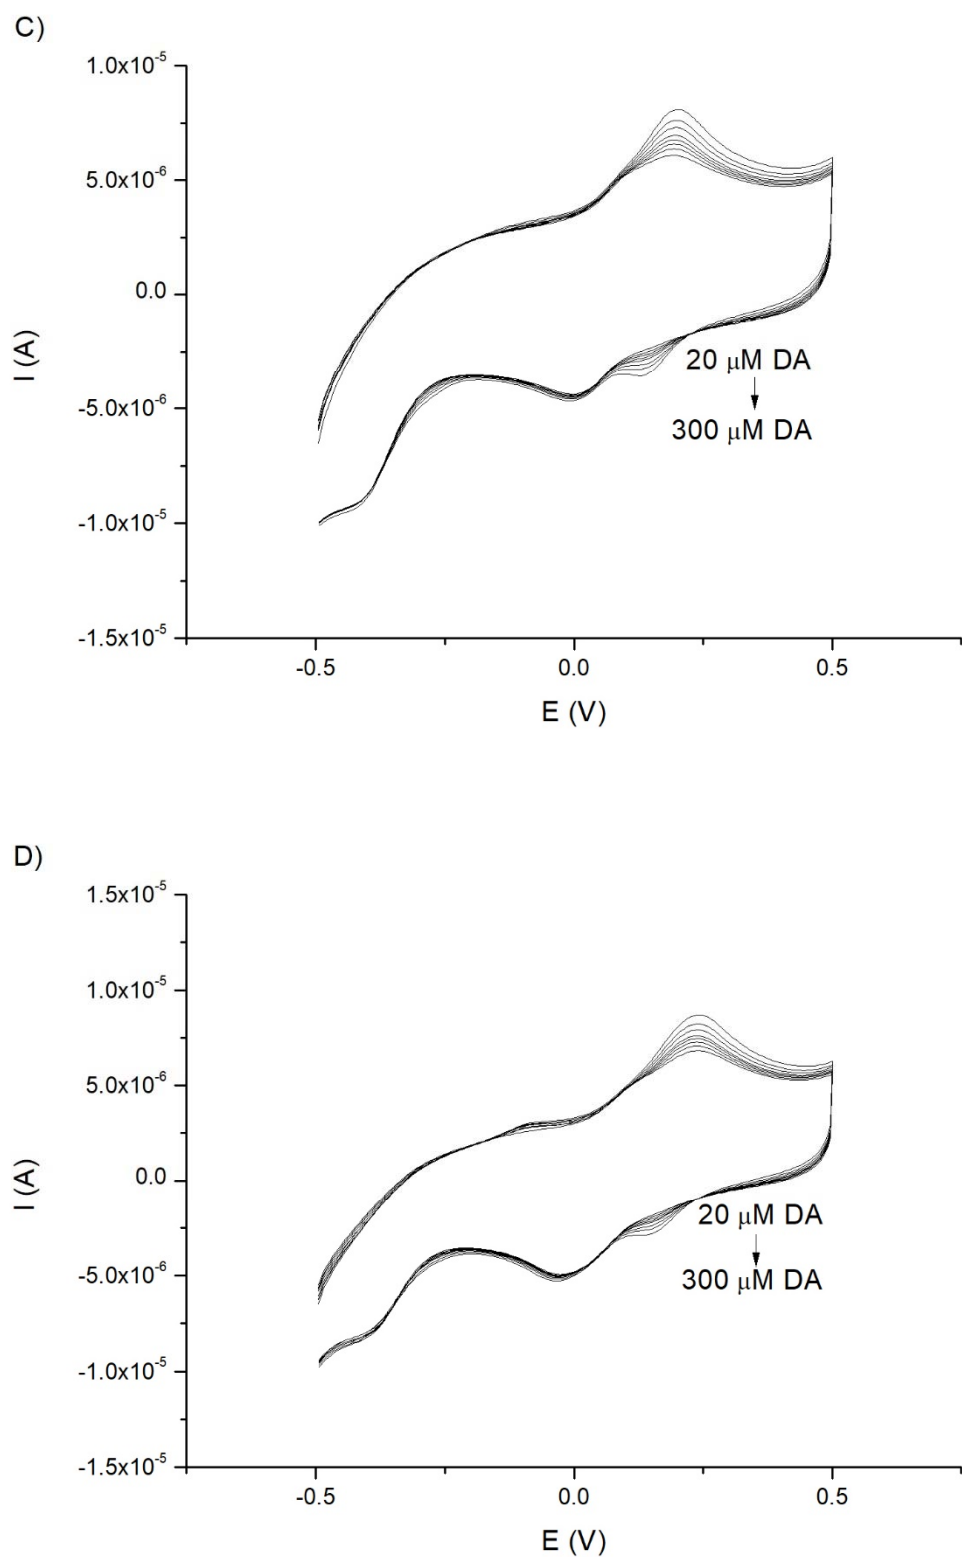

**Figure S3.** Cyclic voltammograms for the determination of dopamine in presence of different concentrations of HQ, using a *SNGC/PEDOT+Tyr-SC* biosensor: (A) 500  $\mu\text{M}$  and (B) 1000  $\mu\text{M}$ , and a *SNGC/PEDOT+Tyr-SC/AuNPs (drop)* biosensor: (C) 500  $\mu\text{M}$  and (D) 1000  $\mu\text{M}$ .

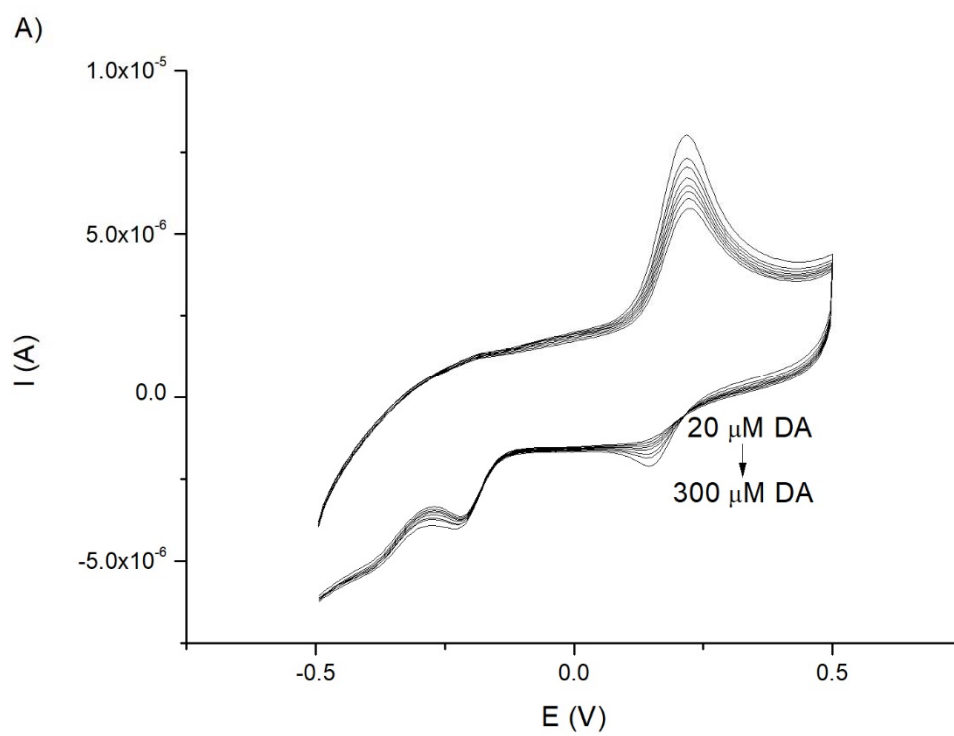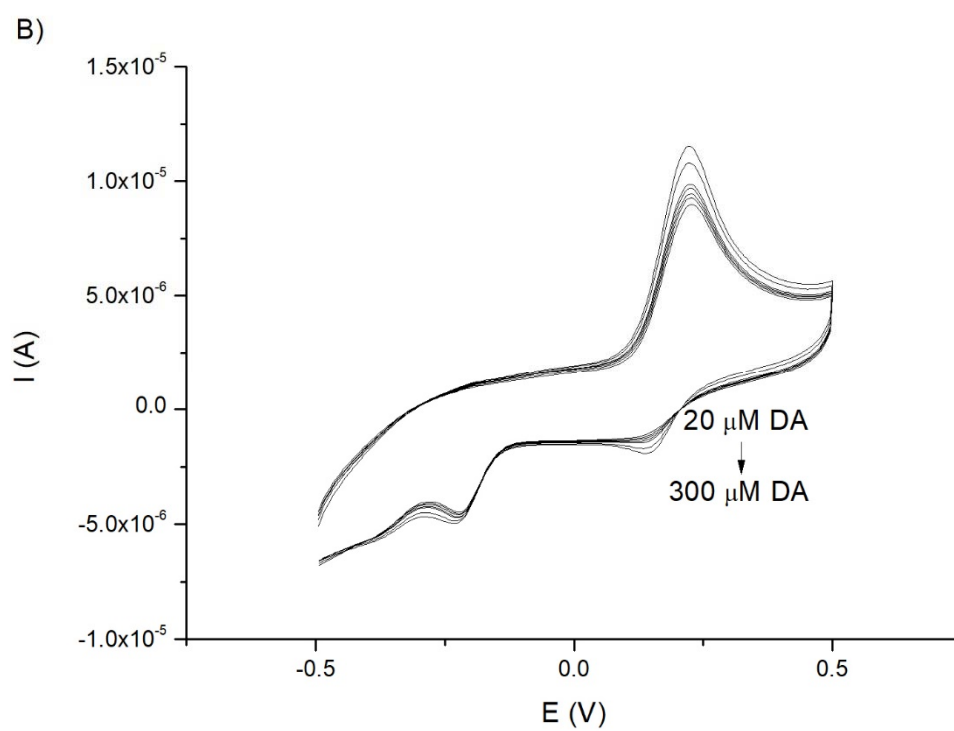

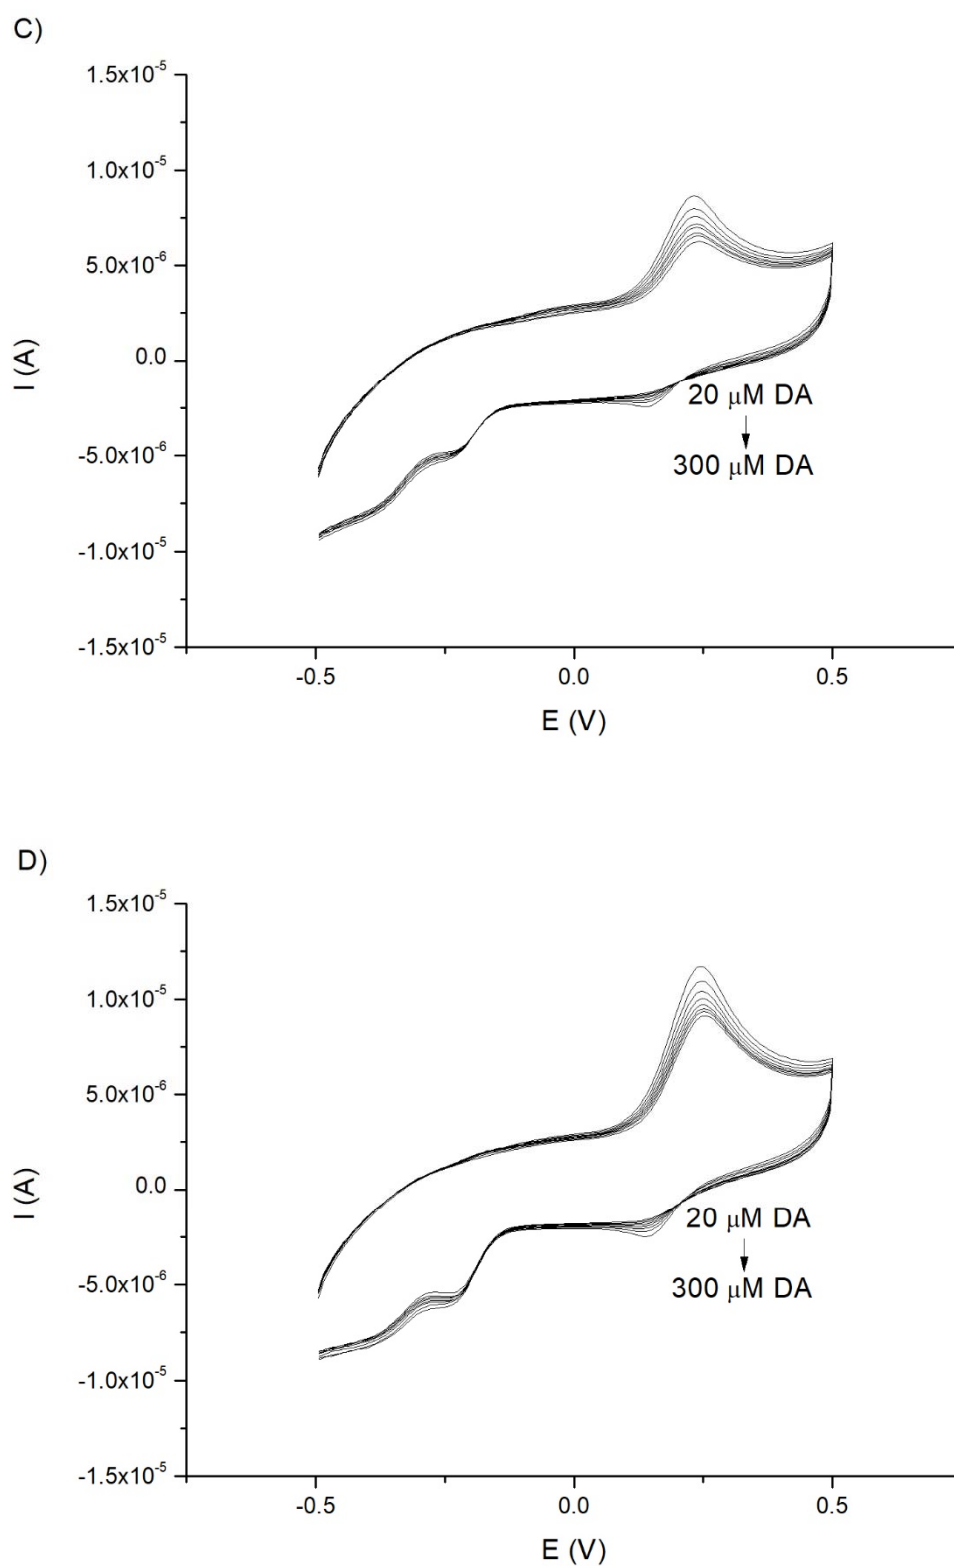

**Figure S4.** (A) Cyclic voltammograms for the determination of dopamine in presence of different concentrations of EPI, using a SNGC/PEDOT+Tyr-SC biosensor: (A) 500  $\mu\text{M}$  and (B) 1000  $\mu\text{M}$ , and a SNGC/PEDOT+Tyr-SC/AuNPs (drop) biosensor: (C) 500  $\mu\text{M}$  and (D) 1000  $\mu\text{M}$ .
